# Supplementary material for: Management of Common Infections in German Primary Care: A Cross-Sectional Survey of Knowledge and Confidence among General Practitioners and Outpatient Pediatricians
Source: MDPI journal article supplement (doi:10.3390/antibiotics10091131), 2021-09-20

Please mark like this: ☐ ☒ ☐ ☐ ☐Corrections: ☐ ☒ ☐ ☒ ☐**1. Information on your own handling of antibiotics**

**There is currently a lot of talk in experts and in the public about the frequent prescription of antibiotics. We would like to know about your experience with antibiotics in everyday life.**

- |     |                                                                                                                                      |                                                                                                                                                                                                         |
|-----|--------------------------------------------------------------------------------------------------------------------------------------|---------------------------------------------------------------------------------------------------------------------------------------------------------------------------------------------------------|
| 1.1 | I feel confident when dealing with antibiotics in general.                                                                           | I don't <input type="checkbox"/> I totally agree. |
| 1.2 | I feel confident to decide whether antibiotics are indicated for the treatment of common infectious diseases in the practice or not. | I don't <input type="checkbox"/> I totally agree. |
| 1.3 | I feel confident in the choice of an antibiotic agent for the treatment of common infectious diseases.                               | I don't <input type="checkbox"/> I totally agree. |
| 1.4 | I feel confident when determining the duration of therapy for an antibiotic for common infectious diseases.                          | I don't <input type="checkbox"/> I totally agree. |
| 1.5 | I feel confident to dose an antibiotic when treating common infectious diseases.                                                     | I don't <input type="checkbox"/> I totally agree. |

**2. How would you rate the following statements: are they right or wrong?**

- |      |                                                                                                                                                                                                                   |                                |                                |
|------|-------------------------------------------------------------------------------------------------------------------------------------------------------------------------------------------------------------------|--------------------------------|--------------------------------|
| 2.1  | Purulent, yellow sputum when coughing indicates the bacterial genesis of an infection and is an indication for antibiotic treatment.                                                                              | <input type="checkbox"/> Right | <input type="checkbox"/> Wrong |
| 2.2  | Cefuroxim (2nd generation cephalosporine) more often leads to the development of antibiotic resistances than Cefaclor (1st generation cephalosporine).                                                            | <input type="checkbox"/> Right | <input type="checkbox"/> Wrong |
| 2.3  | An erythema chronicum migrans should be treated with Doxycycline 200mg / 1 per day.                                                                                                                               | <input type="checkbox"/> Right | <input type="checkbox"/> Wrong |
| 2.4  | The likelihood of resistance development increases with the duration of antibiotic treatment.                                                                                                                     | <input type="checkbox"/> Right | <input type="checkbox"/> Wrong |
| 2.5  | In the treatment of infections, a longer therapy than recommended in the guidelines leads to better treatment results.                                                                                            | <input type="checkbox"/> Right | <input type="checkbox"/> Wrong |
| 2.6  | When treating wound infections, Clindamycin is preferable to other antibiotics because of its good tissue penetrance.                                                                                             | <input type="checkbox"/> Right | <input type="checkbox"/> Wrong |
| 2.7  | Aminopenicillins increase the likelihood of Clostridium difficile-associated diarrhea to the same extent as cephalosporins.                                                                                       | <input type="checkbox"/> Right | <input type="checkbox"/> Wrong |
| 2.8  | If Trimethoprim is used for the three-day therapy of uncomplicated cystitis, 2x200mg/day should be administered.                                                                                                  | <input type="checkbox"/> Right | <input type="checkbox"/> Wrong |
| 2.9  | If an acute uncomplicated cystitis is to be treated with antibiotics, quinolones are <b>not</b> among the therapeutic agents of first choice.                                                                     | <input type="checkbox"/> Right | <input type="checkbox"/> Wrong |
| 2.10 | For the antibiotic treatment of bacterial tonsillitis, a broad spectrum penicillin (e.g. AmoxiClav) should be selected in order to treat other potential pathogens in addition to <i>Streptococcus pyogenes</i> . | <input type="checkbox"/> Right | <input type="checkbox"/> Wrong |

**2. How would you rate the following statements: are they right or wrong? [Fortsetzung]**

- |                                                                                                                                                                                                                  |                                |                                |
|------------------------------------------------------------------------------------------------------------------------------------------------------------------------------------------------------------------|--------------------------------|--------------------------------|
| 2.11 When treating a community-acquired pneumonia without complications in an otherwise healthy adult, cephalosporins should be preferred to aminopenicillins for antibiotic therapy.                            | <input type="checkbox"/> Right | <input type="checkbox"/> Wrong |
| 2.12 The dose of antibiotics for children must be converted into ml of the corresponding liquid formula to be given based on their body weight.                                                                  | <input type="checkbox"/> Right | <input type="checkbox"/> Wrong |
| 2.13 The dosage of Doxycycline must be adjusted to the glomerular filtration rate (GFR) in the presence of renal insufficiency.                                                                                  | <input type="checkbox"/> Right | <input type="checkbox"/> Wrong |
| 2.14 Amoxicillin is suitable for the treatment of an erythema chronicum migrans even in pregnant women and children under the age of 9.                                                                          | <input type="checkbox"/> Right | <input type="checkbox"/> Wrong |
| 2.15 Otitis media in children under the age of 6 should primarily be treated with antibiotics to avoid complications.                                                                                            | <input type="checkbox"/> Right | <input type="checkbox"/> Wrong |
| 2.16 In the treatment of upper respiratory tract infections antibiotics should not usually be prescribed, as they are mostly viral infections.                                                                   | <input type="checkbox"/> Right | <input type="checkbox"/> Wrong |
| 2.17 Female patients with asymptomatic bacteriuria should be treated with antibiotics to prevent the transition to a symptomatic urinary tract infection.                                                        | <input type="checkbox"/> Right | <input type="checkbox"/> Wrong |
| 2.18 If a tonsillitis is treated with oral Penicillin V, Penicillin V should be administered for a period of 7 days.                                                                                             | <input type="checkbox"/> Right | <input type="checkbox"/> Wrong |
| 2.19 If antibiotic therapy is indicated for sinusitis, Amoxicillin 2x500mg/day over the recommended treatment period is suitable.                                                                                | <input type="checkbox"/> Right | <input type="checkbox"/> Wrong |
| 2.20 In the case of mild to moderate pneumonia in a patient without comorbidities, a therapy duration of 5-7 days is usually sufficient and can be shortened when the condition of the patient improves rapidly. | <input type="checkbox"/> Right | <input type="checkbox"/> Wrong |

### 3. When treating infectious diseases, I follow...

- |                                                                       |                       |                          |                          |                          |                          |                          |                          |                          |                  |
|-----------------------------------------------------------------------|-----------------------|--------------------------|--------------------------|--------------------------|--------------------------|--------------------------|--------------------------|--------------------------|------------------|
| 3.1 ... the guideline recommendations of my specialist society.       | I don't agree at all. | <input type="checkbox"/> | I totally agree. |
| 3.2 ... my clinical experience.                                       | I don't agree at all. | <input type="checkbox"/> | I totally agree. |
| 3.3 ... the recommendations from colleagues.                          | I don't agree at all. | <input type="checkbox"/> | I totally agree. |
| 3.4 ... the specialist information provided by the drug manufacturer. | I don't agree at all. | <input type="checkbox"/> | I totally agree. |
| 3.5 ... the patients' wishes.                                         | I don't agree at all. | <input type="checkbox"/> | I totally agree. |

### 4. To what extent do the following situations influence your prescription behaviour for antibiotics?

- |                                                                                                                                                                                            |            |                          |                          |                          |                          |                          |                          |                          |               |
|--------------------------------------------------------------------------------------------------------------------------------------------------------------------------------------------|------------|--------------------------|--------------------------|--------------------------|--------------------------|--------------------------|--------------------------|--------------------------|---------------|
| 4.1 When I find the patient to be very demanding during the consultation, I sometimes give in and prescribe an antibiotic without it being necessarily indicated.                          | not at all | <input type="checkbox"/> | very strongly |
| 4.2 When I am concerned that the patient's symptoms might worsen, for example over the weekend, I sometimes prescribe an antibiotic without it being necessarily indicated.                | not at all | <input type="checkbox"/> | very strongly |
| 4.3 When the waiting room is full, I sometimes prescribe an antibiotic without it being necessarily indicated, in order to make the patient feel good despite the short consultation time. | not at all | <input type="checkbox"/> | very strongly |

### 5. Information on training courses

- |                                                                                                                                       |                                                                 |                                                                              |                          |                          |                          |                          |                          |       |
|---------------------------------------------------------------------------------------------------------------------------------------|-----------------------------------------------------------------|------------------------------------------------------------------------------|--------------------------|--------------------------|--------------------------|--------------------------|--------------------------|-------|
| 5.1 Have you participated in one or more advanced training courses on ( <i>rational</i> ) antibiotic therapy within the last 3 years? | <input type="checkbox"/> Yes                                    | <input type="checkbox"/> No                                                  |                          |                          |                          |                          |                          |       |
| 5.2 Would you like more training on ( <i>rational</i> ) antibiotic therapy?                                                           | <input type="checkbox"/> Yes                                    | <input type="checkbox"/> No                                                  |                          |                          |                          |                          |                          |       |
| 5.3 How sufficient do you perceive the offer for advanced training courses on the subject of ( <i>rational</i> ) antibiotic therapy?  | not at all                                                      | <input type="checkbox"/>                                                     | <input type="checkbox"/> | <input type="checkbox"/> | <input type="checkbox"/> | <input type="checkbox"/> | <input type="checkbox"/> | fully |
| 5.4 What kind of training would you prefer and where? ( <b>Please select 2 options.</b> )                                             |                                                                 |                                                                              |                          |                          |                          |                          |                          |       |
| <input type="checkbox"/> online course                                                                                                | <input type="checkbox"/> single short courses (about 1.5 hours) | <input type="checkbox"/> longer block course on the weekend (about 12 hours) |                          |                          |                          |                          |                          |       |
| <input type="checkbox"/> near the place of residence                                                                                  | <input type="checkbox"/> distance to home up to 100km           | <input type="checkbox"/> distance to home more than 100km                    |                          |                          |                          |                          |                          |       |
| 5.5 If your answer was not mentioned under 5.4, you have the opportunity to contribute your own ideas here:                           |                                                                 |                                                                              |                          |                          |                          |                          |                          |       |

**6. Personal information**

- 6.1 Your gender: ☐ male ☐ female ☐ other
- 6.2 Please indicate your age.
- |                                         |                                         |                                            |
|-----------------------------------------|-----------------------------------------|--------------------------------------------|
| <input type="checkbox"/> 20 to 29 years | <input type="checkbox"/> 30 to 39 years | <input type="checkbox"/> 40 to 49 years    |
| <input type="checkbox"/> 50 to 59 years | <input type="checkbox"/> 60 to 69 years | <input type="checkbox"/> 70 years or older |
- 6.3 Location of the practice (count of inhabitants)
- |                                              |                                                    |                                                |
|----------------------------------------------|----------------------------------------------------|------------------------------------------------|
| <input type="checkbox"/> rural (<5.000)      | <input type="checkbox"/> small town (5.000-20.000) | <input type="checkbox"/> city (20.001-100.000) |
| <input type="checkbox"/> big city (>100.000) |                                                    |                                                |
- 6.4 How long have you been practicing as a doctor?
- |                                             |                                         |                                         |
|---------------------------------------------|-----------------------------------------|-----------------------------------------|
| <input type="checkbox"/> less than 5 years  | <input type="checkbox"/> 5 to 14 years  | <input type="checkbox"/> 15 to 24 years |
| <input type="checkbox"/> 25 to 34 years     | <input type="checkbox"/> 35 to 44 years | <input type="checkbox"/> 45 to 54 years |
| <input type="checkbox"/> more than 55 years |                                         |                                         |
- 6.5 How long have you been working as a general practitioner?
- |                                             |                                         |                                         |
|---------------------------------------------|-----------------------------------------|-----------------------------------------|
| <input type="checkbox"/> less than 5 years  | <input type="checkbox"/> 5 to 14 years  | <input type="checkbox"/> 15 to 24 years |
| <input type="checkbox"/> 25 to 34 years     | <input type="checkbox"/> 35 to 44 years | <input type="checkbox"/> 45 to 54 years |
| <input type="checkbox"/> more than 55 years |                                         |                                         |
- 6.6 What is your position in your practice?
- |                                                          |                                                                         |                                                                         |
|----------------------------------------------------------|-------------------------------------------------------------------------|-------------------------------------------------------------------------|
| <input type="checkbox"/> employed doctor                 | <input type="checkbox"/> doctor in further training in general practice | <input type="checkbox"/> self-employed practice owner in joint practice |
| <input type="checkbox"/> equal partner in joint practice |                                                                         |                                                                         |
- 6.7 What is the structure of the practice you're working in?
- |                                              |                                         |                                              |
|----------------------------------------------|-----------------------------------------|----------------------------------------------|
| <input type="checkbox"/> individual practice | <input type="checkbox"/> joint practice | <input type="checkbox"/> medical care center |
|----------------------------------------------|-----------------------------------------|----------------------------------------------|
- 6.8 What is the number of doctors in the practice you're working in? **(including yourself)**

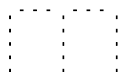

Supplement: s1 [file s1]
