# Supplementary material for: Management of Common Infections in German Primary Care: A Cross-Sectional Survey of Knowledge and Confidence among General Practitioners and Outpatient Pediatricians
Source: Antibiotics (Basel). 2021 Sep 20;10(9):1131. doi: 10.3390/antibiotics10091131 (PMC8466449; doi:10.3390/antibiotics10091131)
Supplement: Supplementary file 1 [file antibiotics-10-01131-s001.zip]

Archive with 4 entries (4 files):
- Survey 1.pdf
- __MACOSX/._Survey 1.pdf
- Survey 2.jpg
- __MACOSX/._Survey 2.jpg
